# Supplementary material for: Lattice variations in CaTiO3 cubes and cuboids and their use in photocatalytic benzimidazole formation
Source: Royal Society of Chemistry journal article supplement (doi:10.1039/d5ta00541h), 2025-01-01
Supplement: d5ta00541h1.pdf [file d5ta00541h1.pdf]

## Supporting Information

### **Lattice variations in CaTiO<sub>3</sub> cubes and cuboids and their use in photocatalytic benzimidazole formation**

*Ya-Ting Yang, Bo-Hao Chen, Arnab Pal, Chih-Hsueh Li, Zong-Hong Lin and Michael H. Huang\**

#### **Synthesis of small CaTiO<sub>3</sub> cubes and cuboids**

To grow 212 nm cubes, 0.041 mL of TiCl<sub>4</sub> was added to 20 mL of H<sub>2</sub>O/EtOH cosolvent in a vial under vigorous stirring for 5 min, then 0.314 mL of 1.187 M CaCl<sub>2</sub>·2H<sub>2</sub>O solution was added and stirred for another 5 min. Next, 0.5 mL of 5 M KOH solution was slowly introduced with stirring for 30 min. Finally, 0.1 mL of 1.187 M KCl solution was added to the mixed solution and kept stirring for 1 min. A Teflon autoclave containing the final suspension was heated at 200 °C in an oven for 3 h. After the reaction, the solution was washed several times with 2 M HNO<sub>3</sub> solution, distilled water, and ethanol. To prepare 156 nm CaTiO<sub>3</sub> cuboids, the steps are the same as described above. However, the KCl solution added is 2 mL.

#### **Photodegradation of rhodamine B using CaTiO<sub>3</sub> crystals**

For fair comparison of photocatalytic activity, the total surface area for each CaTiO<sub>3</sub> shape should be kept the same. Table S3 provides the calculated weights of different samples needed for the photodegradation experiment. For rhodamine B (RhB) photodegradation reaction, CaTiO<sub>3</sub> crystals were weighed and placed inside a quartz cell measuring 4 cm × 4 cm × 4 cm. Subsequently, 45 μL of the RhB solution was added, and the volume was adjusted to 45 mL with water. The quartz cell was then positioned 30 cm away from a xenon lamp with a power density set at 1 W/cm<sup>2</sup>, and stirred on a hot plate. At regular time intervals, 1 mL of the solution was extracted and promptly centrifuged for spectral measurements.

#### **Benzimidazole synthesis using recycled photocatalyst**

Using 2.7 mg of micron-sized CaTiO<sub>3</sub> cubes for the first cycle of the benzimidazole synthesis produced a yield of approximately 67%. After the reaction, the cubes were recovered by centrifugation and rinsed twice with ethanol to remove any possible impurities from the reaction mixture. The remaining solid was dried in vacuum environment for 12 h. Because of the loss of some particles sticking to the centrifuge tube, the used particles were combined to obtain another 2.7 mg of catalyst for the next reaction cycle.

## Electron paramagnetic resonance measurement

Due to the common presence of impurities in commercially available DMPO (5,5-dimethyl-1-pyrroline-N-oxide), it is essential to purify it using activated carbon prior to utilization. First, 30 mg of DMPO was dissolved in 6 mL of methanol. Following the addition of activated carbon, the mixture underwent sonication for 2 min to facilitate the removal of DMPO impurities by the activated carbon. Subsequently, the mixture was subjected to centrifugation to separate the activated carbon, resulting in the acquisition of a pure DMPO solution.

Under atmospheric conditions, 2.7 mg of  $\text{CaTiO}_3$  cuboids was added to the DMPO solution in a 15 mL oven-dried quartz tube. After sonication for 1 min, the mixture underwent 2 min of exposure to Xe lamp radiation. Subsequently, the irradiated mixture was transferred to an Eppendorf tube, covered with aluminum foil, and promptly delivered to the EPR laboratory for measurement.

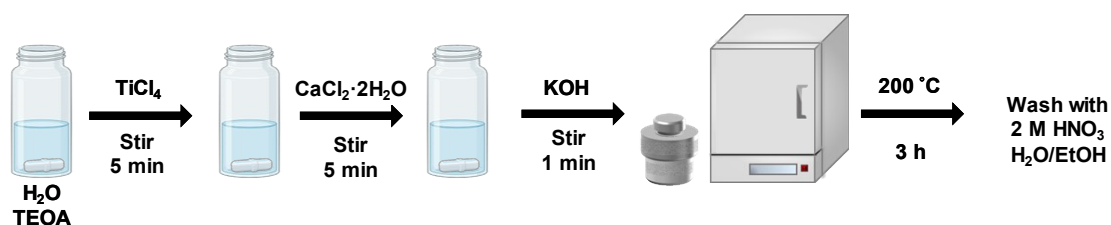

**Fig. S1** Procedure for synthesizing large  $\text{CaTiO}_3$  cubes and cuboids.

**Table S1** Reagent amounts used to grow large  $\text{CaTiO}_3$  cubes and cuboids.

|                                                                                                         |                  |                |                       |                                                              |          |             |       |
|---------------------------------------------------------------------------------------------------------|------------------|----------------|-----------------------|--------------------------------------------------------------|----------|-------------|-------|
| <br>886 nm<br>Cube   | H <sub>2</sub> O | TEOA           | 99% TiCl <sub>4</sub> | 1.187 M CaCl <sub>2</sub> ·2H <sub>2</sub> O                 | 5 M KOH  | Temperature | Time  |
|                                                                                                         | 4.033 mL         | 2 M 15.7 mL    | 0.041 mL              | 0.314 mL                                                     | 0.5 mL   | 200 °C      | 3 h   |
| <br>695 nm<br>Cube   | H <sub>2</sub> O | TEOA           | 99% TiCl <sub>4</sub> | 1.187 M CaCl <sub>2</sub> ·2H <sub>2</sub> O                 | 5 M NaOH | Temperature | Time  |
|                                                                                                         | 4.033 mL         | 2 M 15.7 mL    | 0.02775 mL            | 0.236 mL                                                     | 0.5 mL   | 200 °C      | 3 h   |
| <br>393 nm<br>Cube   | Butanol          | TEOA           | 99% TiCl <sub>4</sub> | 1.187 M CaCl <sub>2</sub> ·2H <sub>2</sub> O                 | 5 M NaOH | Temperature | Time  |
|                                                                                                         | 4.033 mL         | 1.8 M 15.7 mL  | 0.02775 mL            | 0.236 mL                                                     | 0.5 mL   | 190 °C      | 3 h   |
| <br>725 nm<br>Cuboid | Hexanol          | TEOA           | 99% TiCl <sub>4</sub> | 1.187 M Ca(NO <sub>3</sub> ) <sub>2</sub> ·4H <sub>2</sub> O | 5 M KOH  | Temperature | Time  |
|                                                                                                         | 2.017 mL         | 1.78 M 7.85 mL | 0.01388 mL            | 0.118 mL                                                     | 0.25 mL  | 190 °C      | 2.5 h |

**Table S2** Reagent amounts used to grow small CaTiO<sub>3</sub> cubes and cuboids.

|                                                                                                       |                  |         |                       |                                             |         |             |             |      |
|-------------------------------------------------------------------------------------------------------|------------------|---------|-----------------------|---------------------------------------------|---------|-------------|-------------|------|
| <br>212 nm<br>Cube   | H <sub>2</sub> O | Ethanol | 99% TiCl <sub>4</sub> | 1.187 M CaCl <sub>2</sub> ·H <sub>2</sub> O | 5 M KOH | 1.187 M KCl | Temperature | Time |
|                                                                                                       | 10.5 mL          | 9.5 mL  | 0.041 mL              | 0.314 mL                                    | 0.5 mL  | 0.1 mL      | 200 °C      | 3 h  |
| <br>90 nm<br>Cube    | H <sub>2</sub> O | Ethanol | 99% TiCl <sub>4</sub> | 1.187 M CaCl <sub>2</sub> ·H <sub>2</sub> O | 5 M KOH | 1.187 M KCl | Temperature | Time |
|                                                                                                       | 10.5 mL          | 9.5 mL  | 0.041 mL              | 0.314 mL                                    | 0.5 mL  | 0.3 mL      | 200 °C      | 3 h  |
| <br>156 nm<br>Cuboid | H <sub>2</sub> O | Ethanol | 99% TiCl <sub>4</sub> | 1.187 M CaCl <sub>2</sub> ·H <sub>2</sub> O | 5 M KOH | 1.187 M KCl | Temperature | Time |
|                                                                                                       | 10.5 mL          | 9.5 mL  | 0.041 mL              | 0.314 mL                                    | 0.5 mL  | 2 mL        | 200 °C      | 3 h  |

**Table S3** Calculations for weights of CaTiO<sub>3</sub> crystals needed for rhodamine B photodegradation.

| CaTiO <sub>3</sub>                          | 725 nm cuboids                                                                     | 695 nm cubes                                                                       | 156 nm cuboids                                                                     | 212 nm cubes                                                                        |
|---------------------------------------------|------------------------------------------------------------------------------------|------------------------------------------------------------------------------------|------------------------------------------------------------------------------------|-------------------------------------------------------------------------------------|
| model                                       | 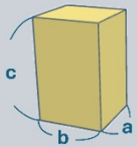 |  |  |  |
| length of a side (nm)                       | a = 440<br>b = 465<br>c = 725                                                      | a = 647<br>b = 666<br>c = 695                                                      | a = 106<br>b = 119<br>c = 156                                                      | a = 168<br>b = 192<br>c = 212                                                       |
| A (nm <sup>2</sup> )                        | 1721450                                                                            | 2686874                                                                            | 112285                                                                             | 217152                                                                              |
| V (nm <sup>3</sup> )                        | 148335000                                                                          | 299476890                                                                          | 1929942                                                                            | 6838272                                                                             |
| weight of single particle (g)               | 5.90373 x 10 <sup>-13</sup>                                                        | 1.19192 x 10 <sup>-12</sup>                                                        | 2.72163 x 10 <sup>-14</sup>                                                        | 7.68117 x 10 <sup>-15</sup>                                                         |
| fixed total surface area (nm <sup>2</sup> ) | 3 x 10 <sup>16</sup>                                                                |
| number of particles                         | 17427168956                                                                        | 11165391455                                                                        | 1.38152 x 10 <sup>11</sup>                                                         | 2.67177 x 10 <sup>11</sup>                                                          |
| weight (mg)                                 | 10.3                                                                               | 13.3                                                                               | 3.8                                                                                | 2.1                                                                                 |

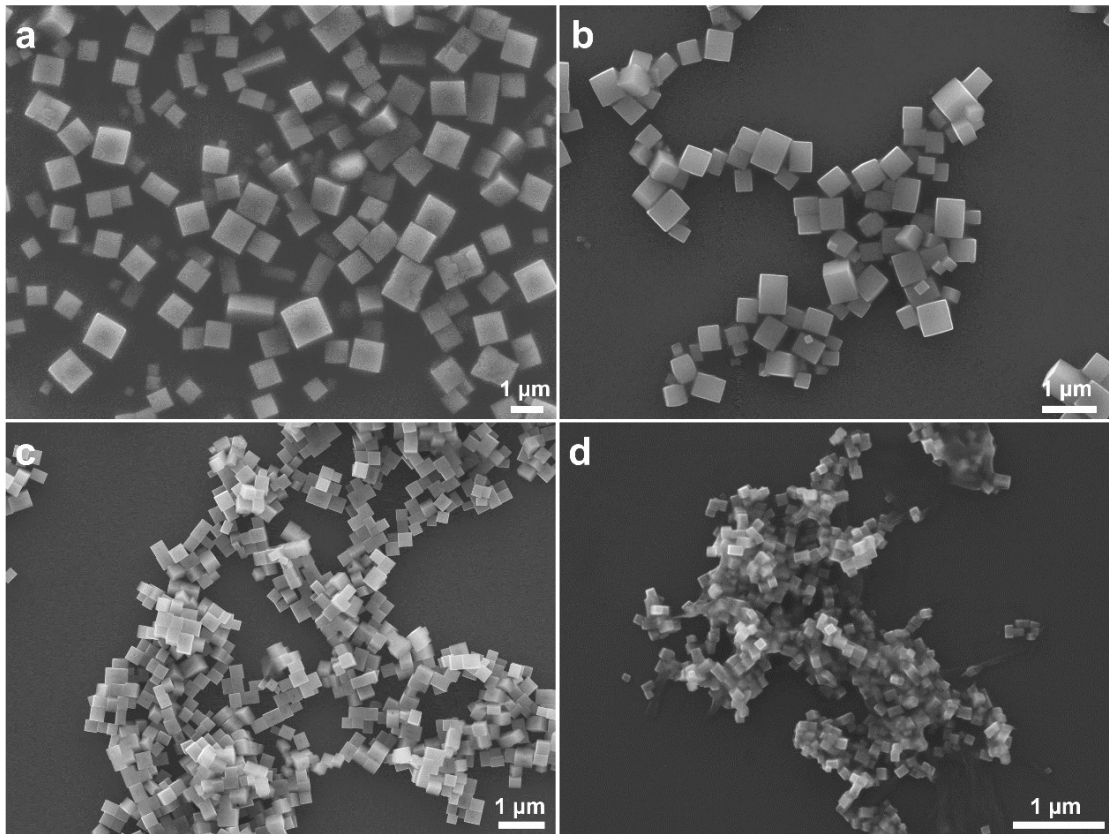

**Fig. S2** SEM images of (a) 886, (b) 393, (c) 253, and (d) 90 nm CaTiO<sub>3</sub> cubes.

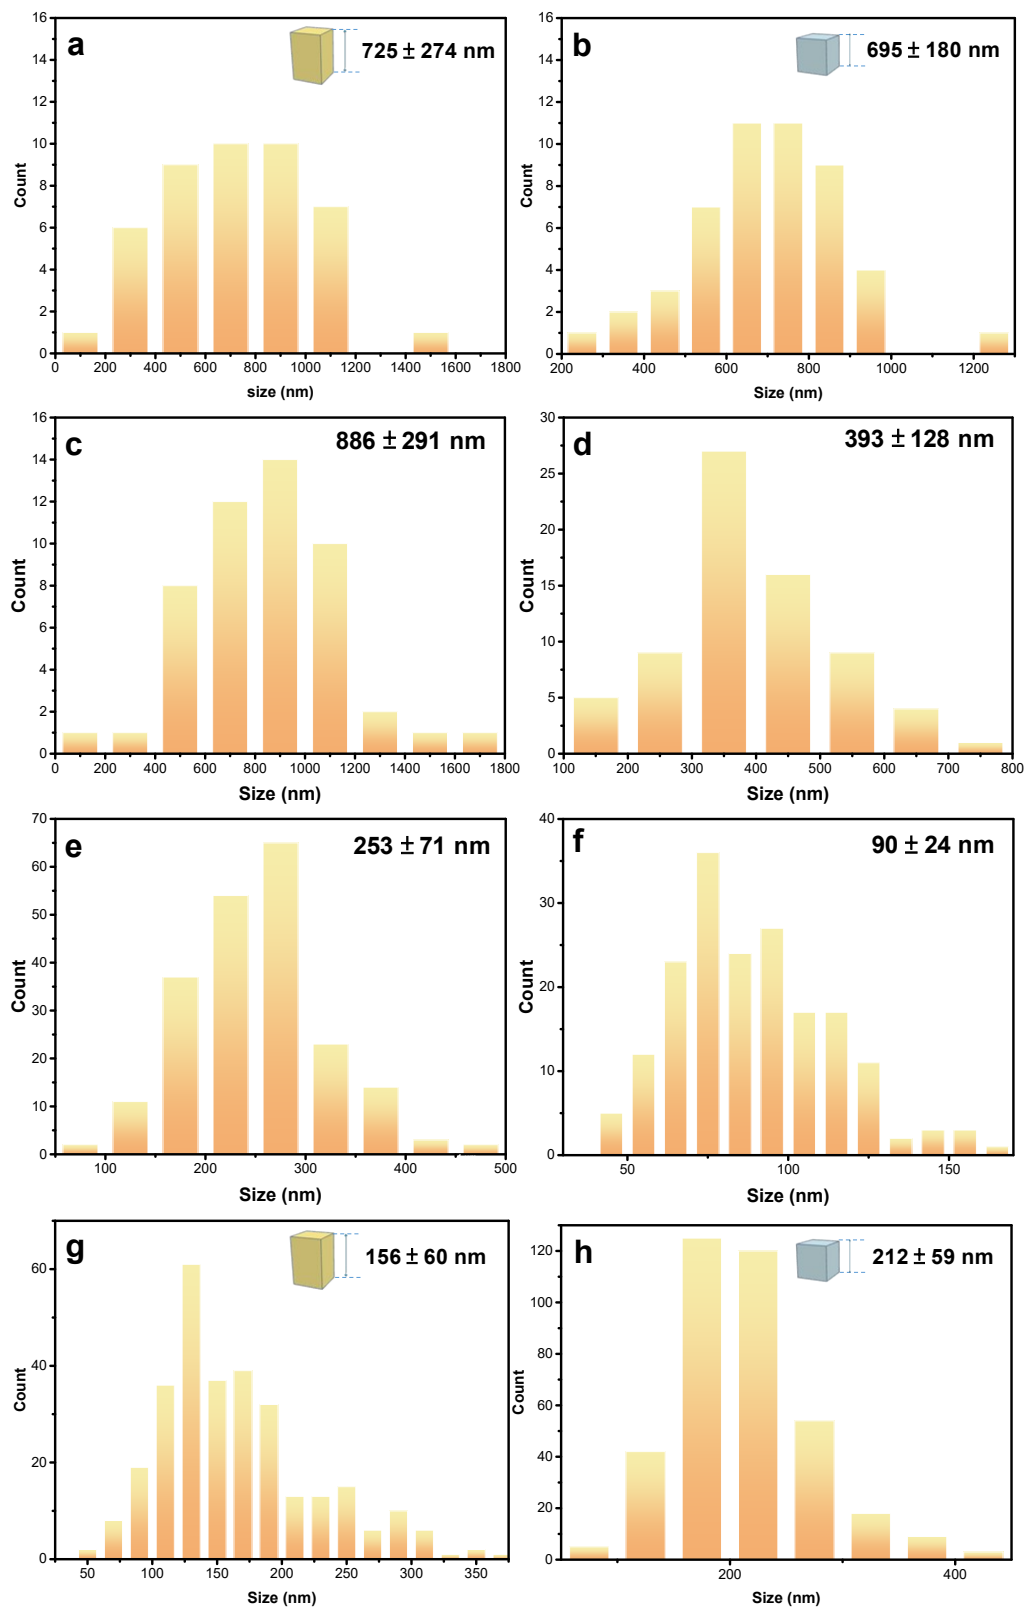

**Fig. S3** Size distribution histograms of  $\text{CaTiO}_3$  (a, g) cuboids and (b, c–f, h) cubes.

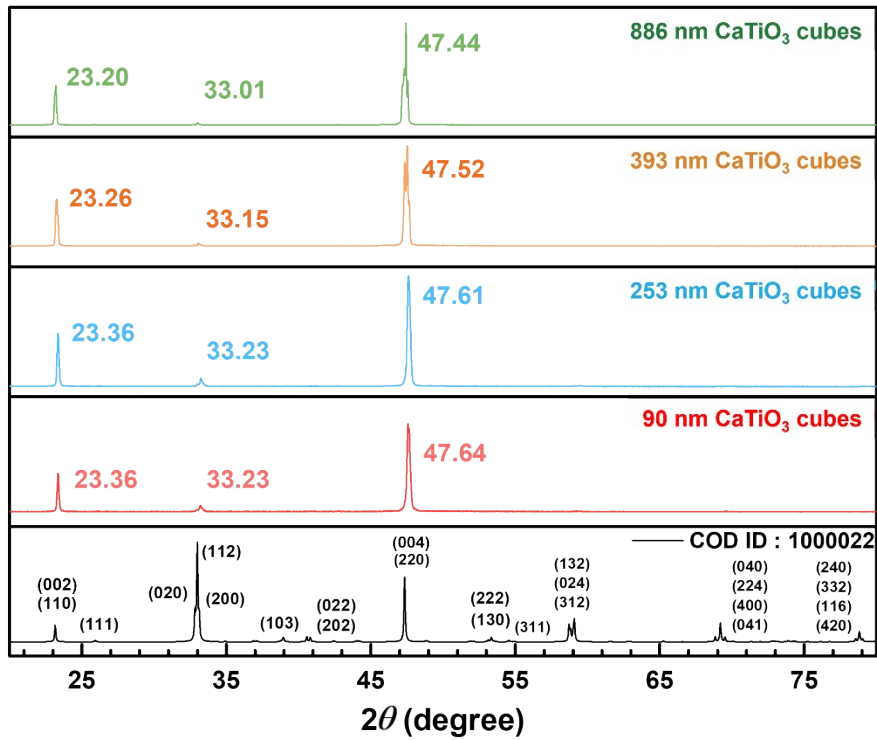

Fig. S4 XRD patterns of size-tunable  $\text{CaTiO}_3$  cubes and a reference pattern.

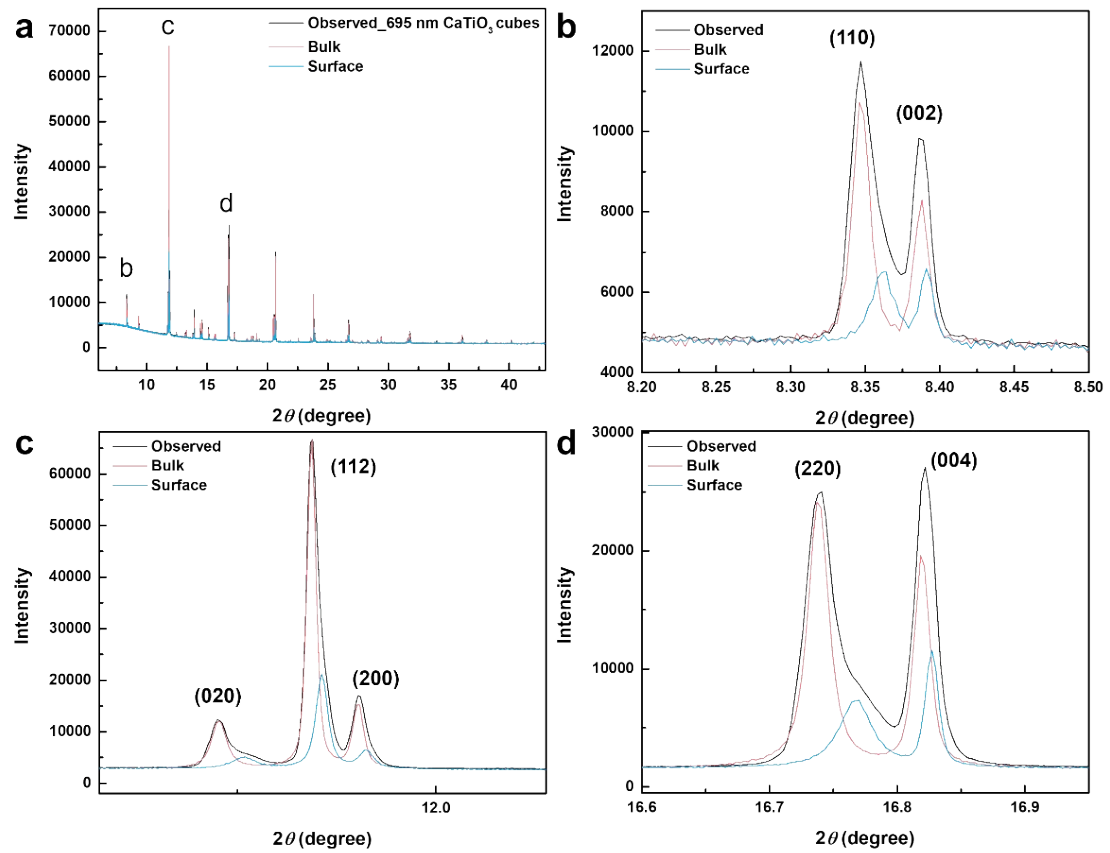

Fig. S5 (a–d) Rietveld refinement of 695 nm  $\text{CaTiO}_3$  cubes into bulk and surface lattice components.

**Table S4** Crystallographic data of CaTiO<sub>3</sub> cuboids and cubes.

| Morphology                         | 725 nm Cuboids                                                 |                | 695 nm Cubes |                |
|------------------------------------|----------------------------------------------------------------|----------------|--------------|----------------|
| Formula                            | CaTiO <sub>3</sub>                                             |                |              |                |
| Radiation source                   | TPS 19A                                                        |                |              |                |
| Wavelength (Å)                     | 0.56025                                                        |                |              |                |
| Crystal system                     | Orthorhombic                                                   |                |              |                |
| Space group                        | P b n m (62)                                                   |                |              |                |
| Z (repeat unit)                    | 4                                                              |                |              |                |
| 2θ range (°)                       | 6.0 to 43.0                                                    |                |              |                |
| Rietveld refinement                | GSAS II<br>( <i>J. Appl. Cryst.</i> <b>2013</b> , 46, 544–549) |                |              |                |
| <i>d</i> -spacing resolution (Å)   | 0.764                                                          |                |              |                |
| Zero-point shift (°)               | 0.0001                                                         |                | 0.0014       |                |
| Phases                             | <b>Bulk</b>                                                    | <b>Surface</b> | <b>Bulk</b>  | <b>Surface</b> |
| <i>a</i> (Å)                       | 5.40394(5)                                                     | 5.39734(6)     | 5.40417(3)   | 5.39952(8)     |
| <i>b</i> (Å)                       | 5.48185(7)                                                     | 5.46818(8)     | 5.48464(3)   | 5.47024(2)     |
| <i>c</i> (Å)                       | 7.66070(7)                                                     | 7.65866(6)     | 7.66205(3)   | 7.65850(5)     |
| V (Å <sup>3</sup> )                | 226.938(5)                                                     | 226.035(5)     | 227.103(3)   | 226.206(7)     |
| $\alpha, \beta, \gamma$ (°)        | 90                                                             |                |              |                |
| <i>c/a</i>                         | 1.4176                                                         | 1.4190         | 1.4178       | 1.4184         |
| Weight percentage (%)              | 46.0(6)                                                        | 54.0 (6)       | 72.3(5)      | 27.7(5)        |
| Mean $\mu$ strain ( $\Delta d/d$ ) | 0.002644                                                       | 0.003167       | 0.002367     | 0.003373       |
| R(F <sup>2</sup> ) (%)             | 9.288                                                          | 9.095          | 9.296        | 9.930          |
| wR (%)                             | 5.234                                                          |                | 3.678        |                |

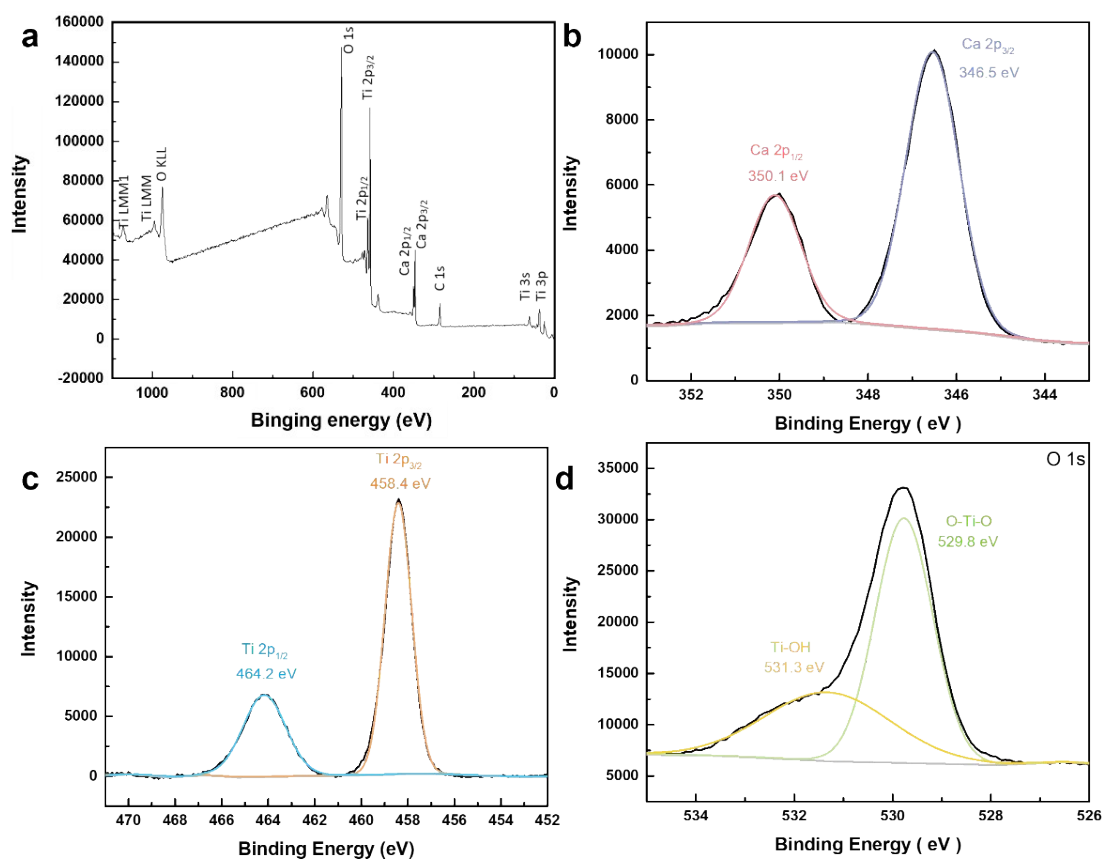

**Fig. S6** XPS spectra of 725 nm  $\text{CaTiO}_3$  cuboids. (a) Full XPS spectra. (b–d) Expanded HR-XPS spectra of the (b) Ca 2p, (c) Ti 2p, and (d) O 1s peaks. The C 1s peak is utilized for instrument error calibration.

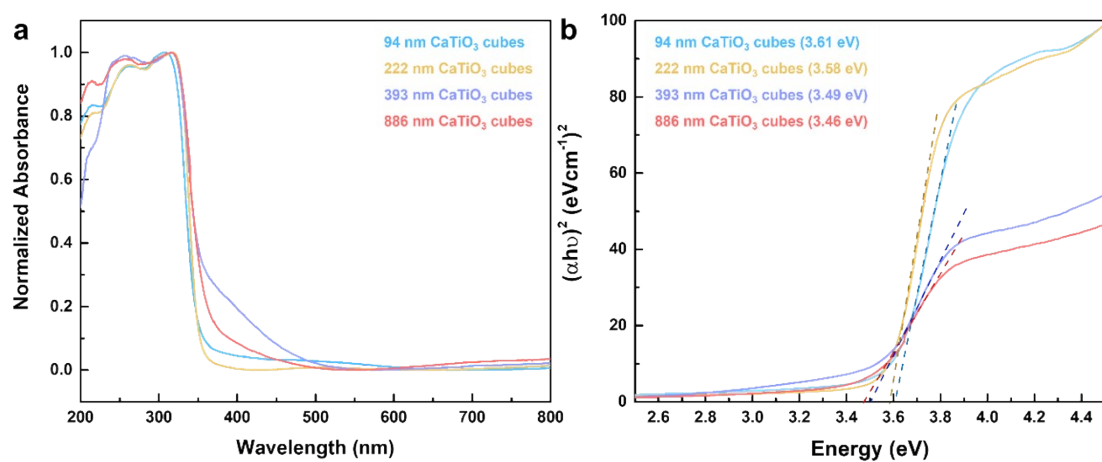

**Fig. S7** (a) Diffuse reflectance spectra of size-tunable  $\text{CaTiO}_3$  cubes and (b) the corresponding Tauc plot.



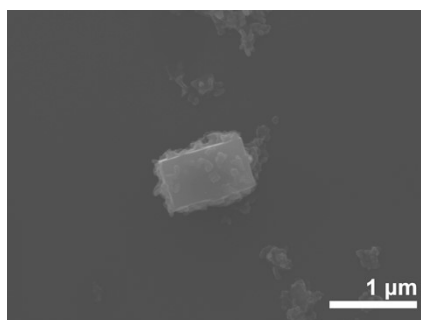

**Fig. S8** SEM image of a  $\text{CaTiO}_3$  cuboid after the photodegradation experiment.

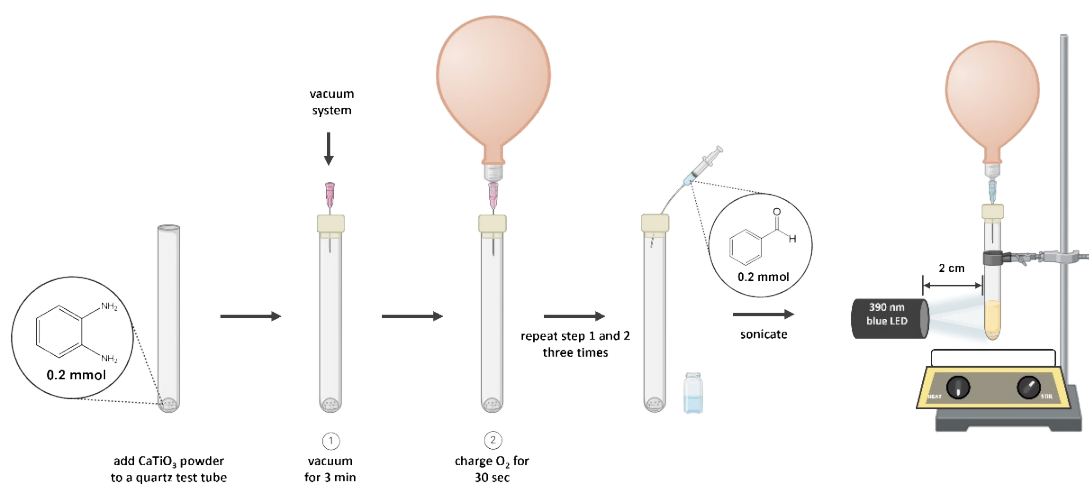

**Fig. S9** Procedure for the synthesis of benzimidazoles.

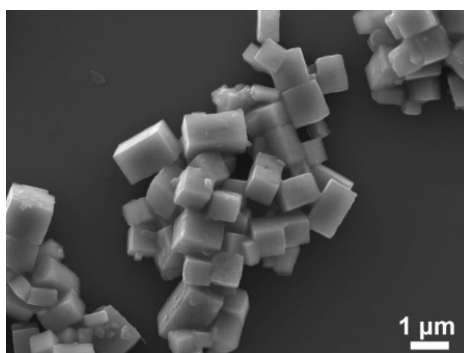

**Fig. S10** SEM image of  $\text{CaTiO}_3$  cuboids after the benzimidazole synthesis experiment.

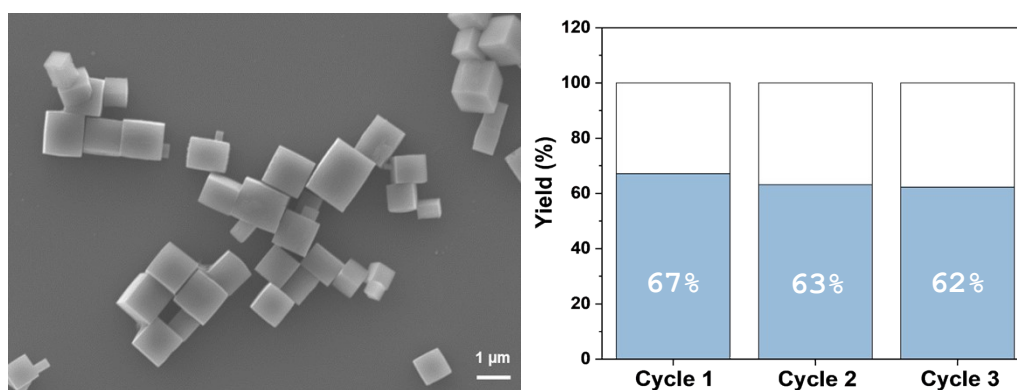

**Fig. S11** Benzimidazole synthesis with 3 cycles of reactions using 2.7 mg of micron-sized  $\text{CaTiO}_3$  cubes as the catalyst.

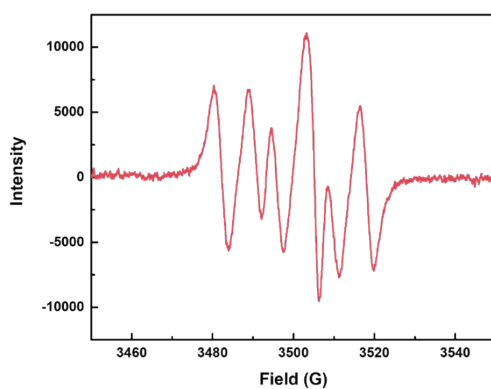

**Fig. S12** EPR spectrum of photoirradiated  $\text{CaTiO}_3$  cuboids dispersed in methanol.

### Spectroscopic Data

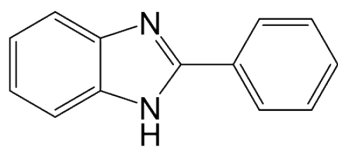

#### 2-phenyl-1H-benzimidazole

$^1\text{H}$  NMR (400 MHz, DMSO- $d_6$ ):  $\delta$  (ppm) 12.92 (s, 1H, NH), 8.19–8.16 (d, 2H, Ar-H,  $J = 4.0$  Hz), 7.58–7.44 (m, 5H, Ar-H), 7.19–7.16 (m, 2H, Ar-H);  $^{13}\text{C}$  NMR (151 MHz, DMSO- $d_6$ )  $\delta$  151.6, 130.0, 129.31, 126.9.

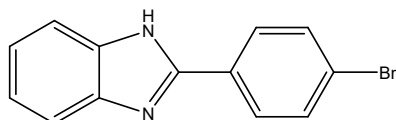

#### 2-(4-bromophenyl)-1H-benzimidazole

$^1\text{H}$  NMR (400 MHz, DMSO- $d_6$ ):  $\delta$  (ppm), 8.12 (d, 2H,  $J = 7.8$  Hz), 7.76 (d, 2H,  $J = 8.4$  Hz), 7.60 (s, 2H).

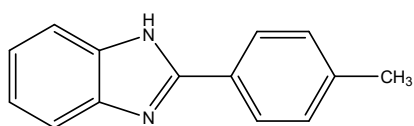

#### 2-(4-methylphenyl)-1H-benzimidazole

$^1\text{H}$  NMR (400 MHz, DMSO- $d_6$ ):  $\delta$  (ppm) 12.89 (br, 1H), 8.14 (d, 2H,  $J = 8.0$  Hz), 7.50 (d, 2H, Ar-H), 7.27–7.11 (m, 4H, Ar-H).

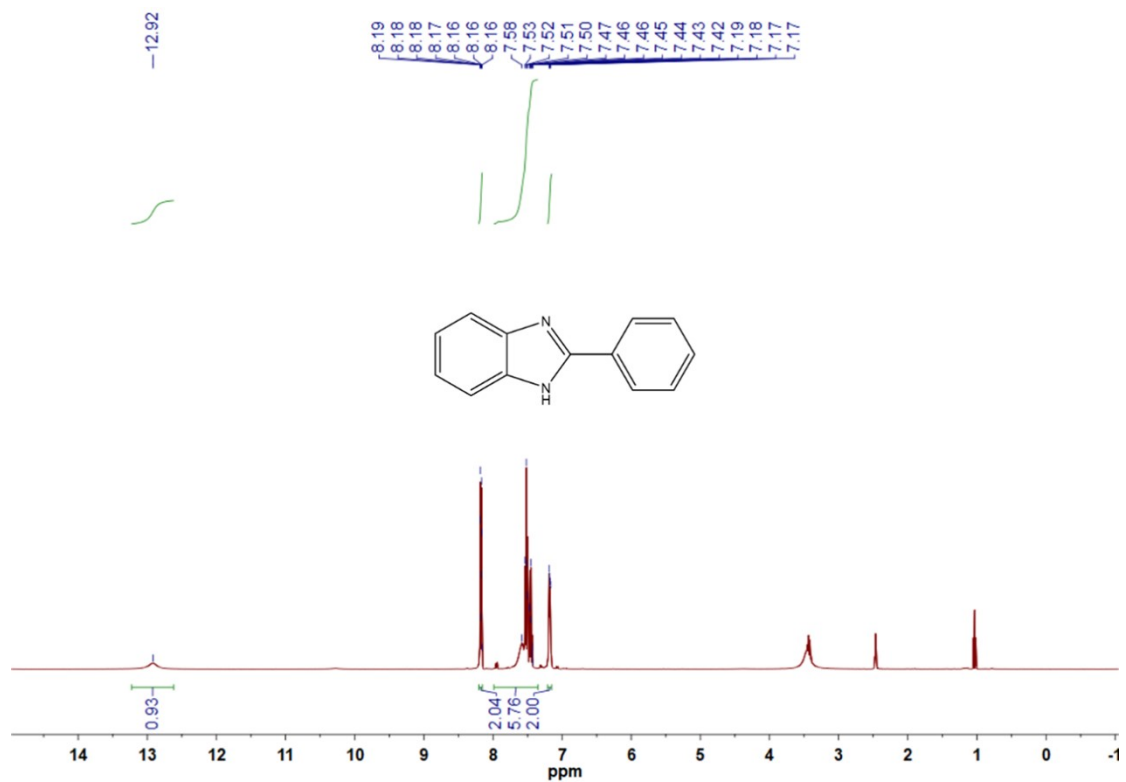

**Spectrum S1.** Crude  $^1\text{H}$  NMR spectrum of 2-phenyl-1H-benzo[d]imidazole ( $\text{d}_6$ -DMSO, 400 MHz).

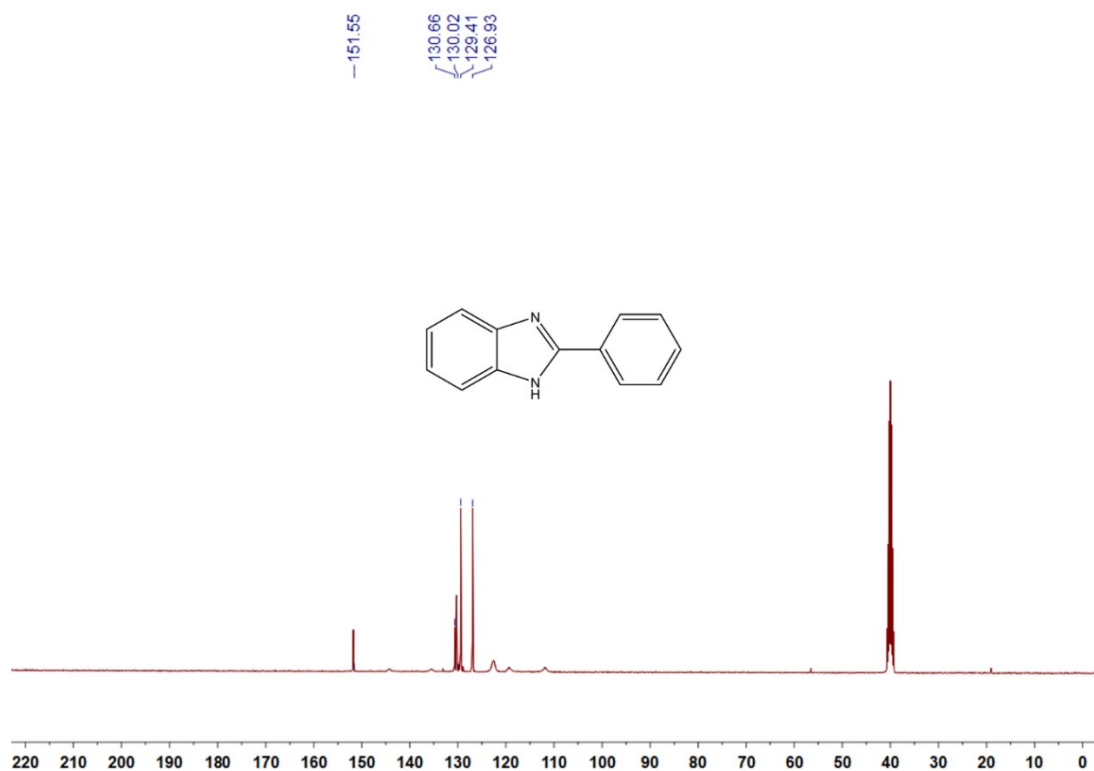

**Spectrum S2.**  $^{13}\text{C}$  NMR spectrum of 2-phenyl-1H-benzo[d]imidazole ( $\text{d}_6$ -DMSO, 100 MHz).

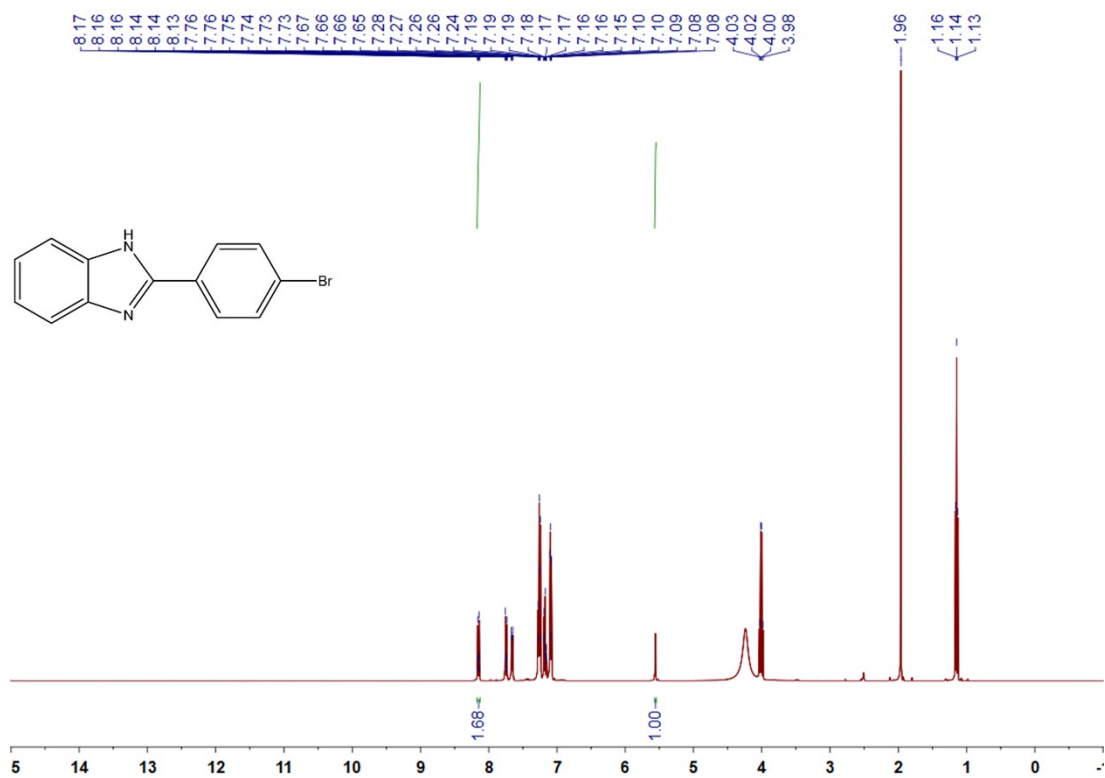

**Spectrum S3.** Crude <sup>1</sup>H NMR spectrum of 2-(4-bromophenyl)-1H-benzimidazole (d<sub>6</sub>-DMSO, 400 MHz).

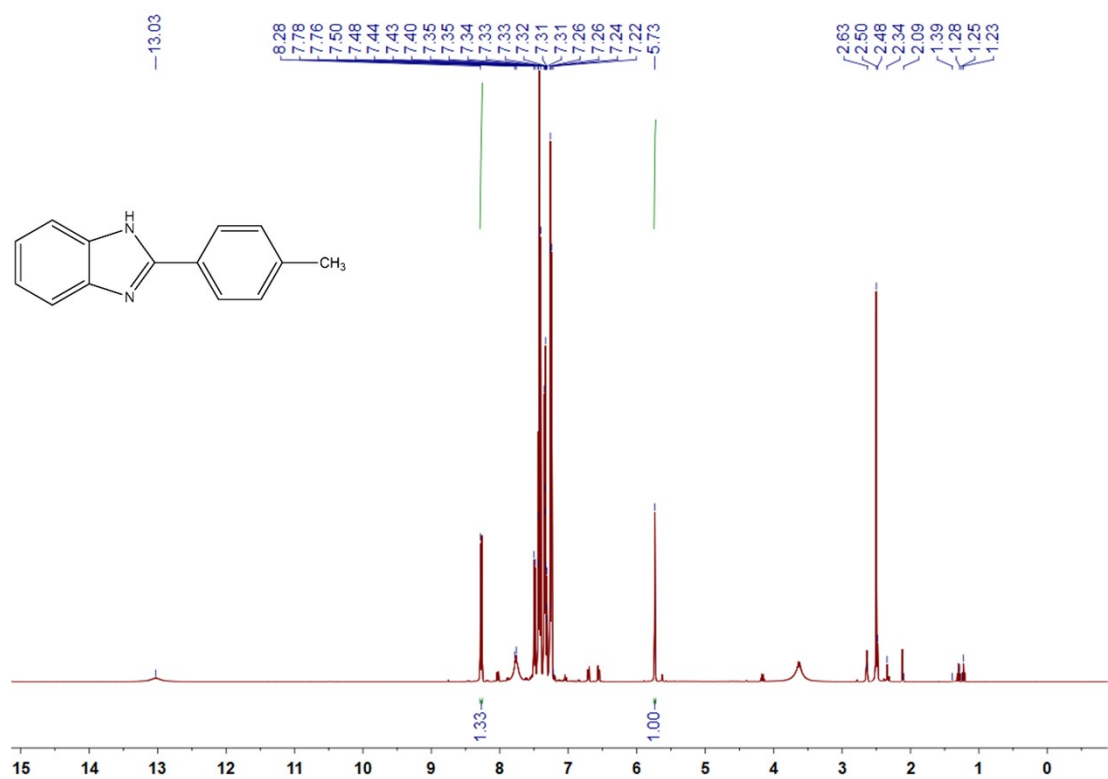

**Spectrum S4.** Crude <sup>1</sup>H NMR spectrum of 2-(4-methylphenyl)-1H-benzimidazole (d<sub>6</sub>-DMSO, 400 MHz).
